# Supplementary material for: Six-minute rowing test: a practical tool for training prescription, from ventilatory thresholds and power outputs, in amateur male rowers
Source: PeerJ. 2023 Sep 29;11:e16160. doi: 10.7717/peerj.16160 (PMC10544309; doi:10.7717/peerj.16160)
Supplement: Supplemental Information 1 [file peerj-11-16160-s001.xlsx]

## Sheet: Dataset
								VO2max										VT1															VT2																6-minute rowing test
								VEVO2MAX	VO2MAX	RQVO2MAX	VO2MAX	HR		Pace		MAP	Stroke Rate	VEVO2MAX				RQVO2MAX		VO2MAX		HR		Power Output		Pace		Stroke rate	VEVO2MAX				RQVO2MAX		VO2MAX		HR		Power Output		Pace		Stroke rate		Distance
ID	SEX	Age (years)	HR max Teorical	Weight (kg)	Height (cm)	BMI	Fat (%)	L·min-1	LO2·min-1	VCO2/VO2	mLO2·kg-1·min-1	HRVO2MAX	%	s	min:s	Watts	ppm	L·min-1	%	LO2·min-1	%	VCO2/VO2	%	mLO2·kg-1·min-1	%	bpm	%	Watts	%	s	min:s	ppm	L·min-1	%	mLO2·min-1	%	VCO2/VO2	%	mLO2·kg-1·min-1	%	bpm	%	Watts	%	s	min:s	ppm		m
1	M	19	192.7	82.8	178.5	25.9869	14.9	143.555	3.99655	1.22125	48.268	192.511	99.9021	101.187	00:01:41.187000	338.205	30.5268	48.23	33.5969	2.02	50.5436	0.83	67.9632	24.4	50.5511	126	65.3866	130	38.4382	139	00:02:19	24.5	82.54	57.4972	3.086	77.2167	0.98	80.2456	37.28	77.2354	156	80.9549	200	59.1357	120	00:02:00	26		1725
2	M	20	192	103.6	182	31.2764	19.9	139.583	3.79177	1.23375	36.6004	197.333	102.778	111.429	00:01:51.429000	253.5	27.2857	52.62	37.698	2.045	53.9326	0.92	74.5694	19.74	53.9338	149	77.6042	104.3	41.144	149	00:02:29	27.4	94.23	67.5081	2.967	78.2485	1.13	91.5907	28.65	78.2778	175.1	91.1979	168	66.2722	127	00:02:07	30.1		1590
3	M	20	192	77.6	172	26.2304	15.1	141.754	3.6682	1.2114	47.2703	192.166	100.086	104.814	00:01:44.814000	304.143	27.3571	41.45	29.2408	2.077	56.6217	0.62	51.1806	26.77	56.6318	134.3	69.9479	105	34.5233	149	00:02:29	15.5	73.02	51.5118	3.035	82.738	0.85	70.167	39.12	82.7581	149.2	77.7083	201	66.0874	120	00:02:00	19.8		1674
4	M	25	188.5	78.1	169	27.345	12.2	167.807	3.90045	1.30895	49.9416	193.667	102.741	100.106	00:01:40.106000	349.861	34.2361	50.05	29.826	2.078	53.2759	0.8	61.1176	26.61	53.2822	132	70.0265	142	40.5875	136	00:02:16	17	92.44	55.0872	3.12	79.9908	0.98	74.869	39.95	79.9934	136.45	72.3873	232	66.312	114	00:01:54	22.2		1715
5	M	20	192	68.2	174	22.5261	10.2	170.784	3.31806	1.31719	48.6517	203.029	105.744	104.796	00:01:44.796000	304.205	29.1964	43.85	25.6758	1.843	55.5445	0.76	57.6986	27.03	55.5582	132.2	68.8542	104	34.1874	149	00:02:29	18.3	84.76	49.6301	2.716	81.855	0.98	74.4008	39.83	81.8677	171.5	89.3229	174	57.1982	126	00:02:06	17.6		1665
6	M	21	191.3	78.9	180	24.3519	13.6	127.183	3.42303	1.23578	43.3848	187.933	98.2401	107.393	00:01:47.393000	283.167	37.6944	37.43	29.43	1.722	50.3063	0.79	63.9274	21.83	50.3172	132	69.0016	131	46.2625	138	00:02:18	25	67.06	52.7271	2.621	76.5696	0.95	76.8747	33.22	76.5706	157.2	82.1746	206	72.7487	119	00:01:59	29.6		1642
7	M	27	187.1	76.7	177	24.4821	7.1	138.372	3.33228	1.20361	43.4456	181.118	96.8026	106.494	00:01:46.494000	335.861	32.9653	81.68	59.0294	1.914	57.4382	0.78	64.8051	24.96	57.4512	138	73.7573	142	42.2794	135	00:02:15	22	81.68	59.0294	2.878	86.3673	0.93	77.2676	37.53	86.3839	165.7	88.5623	241	71.7559	113	00:01:53	25		1710
8	M	18	193.4	78.6	172	26.5684	10.7	155.64	4.13907	1.31207	52.6597	188.419	97.4245	102.575	00:01:42.575000	324.75	30.125	48.66	31.2645	2.214	53.4903	0.78	59.448	28.17	53.4945	132.1	68.304	135	41.5704	137	00:02:17	17.2	85.06	54.6519	3.254	78.6167	1	76.2154	41.31	78.4471	163.9	84.7466	242	74.5189	113	00:01:53	21.4		1734
9	M	20	192	77.8	180	24.0123	11.2	159.235	3.78144	1.3298	48.6043	198.645	103.461	100.95	00:01:40.950000	341.049	34.4306	46.78	29.3779	2.084	55.1113	0.87	65.4232	26.8	55.1391	135.5	70.5729	125	36.6517	141	00:02:21	23.3	76.18	47.8412	2.975	78.6738	1.01	75.951	38.24	78.6761	170	88.5417	202	59.2291	120	00:02:00	26.3		1694
10	M	20	192	76.5	172.3	25.7686	15.6	158.518	3.33315	1.30288	43.5715	198.885	103.586	100.554	00:01:40.554000	344.458	35.2708	44.71	28.205	2.019	60.5734	0.7	53.7269	26.4	60.59	131.3	68.3854	112	32.5148	146	00:02:26	15	76.2	48.0703	2.688	80.6445	0.91	69.845	35.14	80.649	167.8	87.3958	202	58.6428	120	00:02:00	17.3		1703
11	M	20	192	79.1	186	22.8639	10.6	142.718	3.7436	1.22397	47.3272	191.487	99.7326	104.95	00:01:44.950000	304.107	29.2321	44.4	31.1103	2.173	58.0458	0.68	55.5568	27.48	58.0639	125.8	65.5208	123	40.4463	141	00:02:21	22	84.49	59.2008	3.054	81.5793	0.99	80.8841	38.61	81.581	163.7	85.2604	206	67.7393	119	00:01:59	23.7		1693
12	M	20	192	80.2	179	25.0304	12.9	141.798	3.32827	1.23656	41.4997	185.531	96.6309	103.525	00:01:43.525000	315.875	32.4375	41.61	29.3445	1.889	56.7562	0.79	63.8868	21	50.6028	131.4	68.4375	99	31.3415	153	00:02:33	21	91.93	64.8316	2.71	81.4236	1.02	82.4867	33.79	81.4223	167	86.9792	235	74.3965	114	00:01:54	25.8		1688
13	M	21	191.3	74.5	170	25.7785	14.2	149.51	3.78836	1.23131	50.8499	186.136	97.3004	97.6132	00:01:37.613000	336.946	30.875	50.08	33.496	2.285	60.3164	0.86	69.8443	30.67	60.3148	129.3	67.5902	138	40.9561	132	00:02:12	16.8	99.37	66.4636	3.267	86.2379	1.04	84.4629	43.86	86.2539	168.4	88.0293	270	80.1314	108	00:01:48	25		1748
14	M	21	191.3	75.3	178.5	23.633	13.9	152.624	3.442	1.20983	45.7097	190.3	99.4773	100.475	00:01:40.475000	345.25	31.5625	48.8	31.974	1.852	53.8059	0.77	63.6451	24.6	53.8179	132.9	69.472	124	35.916	141	00:02:21	19.2	82.25	53.8907	2.626	76.2928	0.96	79.3498	34.88	76.3076	164.9	86.1997	228	66.0391	115	00:01:55	24.8		1732
15	M	21	191.3	88.8	180	27.4074	13	150.883	3.88069	1.22042	43.7008	194.458	101.651	103.525	00:01:43.525000	315.667	25.0833	46.66	30.9246	2.126	54.7841	0.71	58.1769	23.94	54.7816	136.3	71.2493	109	34.5301	147	00:02:27	15.5	84.62	56.0832	3.18	81.9442	0.95	77.8423	35.81	81.9435	177.5	92.7862	201	63.6748	120	00:02:00	17.3		1721
16	M	19	192.7	78.2	169	27.38	11.3	162.294	3.88736	1.18645	49.71	177.014	91.86	103.014	00:01:43.014000	320.83	28.8304	55.15	33.9816	2.146	55.2046	0.82	69.1136	27.45	55.2203	126.5	65.6461	116	36.1562	145	00:02:25	24.2	87.75	54.0687	2.928	75.3211	0.95	80.0706	37.45	75.337	150.3	77.9969	195	60.7798	121	00:02:01	25.7		1723
[truncated: 10 more columns]
